# Supplementary material
Source: Springer Nature journal article supplement (https://www.springermedizin.de/resource/supplementary/12865_2009_301_MOESM4_ESM.pdf/9427706)
Supplement: MOESM4 [file 9427706]

\* \* \*\*

```

571 GCILGFVSKEREKALLTGKCPGTFLLRFS*ESSRDG*AITFTWVEHDQYD-KPVFHAVEPYTKK**ssSTAT1a
571 GCILGFVSKEREKALLTGKCPGTFLLRFS*ESSRDG*AITFTWVEHDQYD-KPVFHAVEPYTKK**ssSTAT1
571 GCILGFVSKEREKALLTGKCPGTFLLRFS*ESSRDG*AITFTWVEHDQYD-KPVFHAVEPYTKK**BT045567
571 GCILGFVSKEREKALLTGKCPGTFLLRFS*ESSRDG*AITFTWVEHDQYN-KPVFHAVEPYTKK**rtSTAT1
576 GCIMGFISKERERALLKDQQPGTFLLRFS*ESSREG*AITFTWVERS*QNGGEPDFHAVEPYTKK**HsSTAT1

```

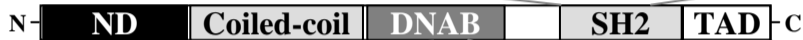

```

393 SLAAEFRHLQLKEQKVAGNRTNEG*PLIVTEELHCICFES*ELNQSGLLELKLETISLPIVVI* ssSTAT1a
393 SLAAEFRHLQLKEQKVAGNRTNEG*PLIVTEELHCICFES*ELNQSGLLELKLETISLPIVVI* ssSTAT1
393 SLAAEFRHLQLKEQKVAGNRTNEG*PLIVTEELHCICFES*ELNQSGLLELKLETISLPIVVI* BT045567
393 SLAAEFRHLQLKEQKVAGNRTNEG*PLIVTEELHCICFES*ELNQSGLLELKLETISLPIVVI* rtSTAT1
399 SLAAEFRHLQLKEQKNAGTRTNEG*PLIVTEELHSLSFETQLCQ*PLVIDLETTSLPVVVI* HsSTAT1

```

NES \* \* \* \*  
 \* \* \* \*  
 NLS

\* \*

```

689 SSSSTGYMKTE*ELISVSEVHPSRLQDN--MMPMSPDVF*GELKRSVAPVVFQCWTGPKEIDAV-----MFENTPDLDRN* ssSTAT1a
689 SSSSTGYMKTE*ELISVSEVHPSRLQDN--MMPMSPDVF*GELKRSVR-----QCPVLDWS* ssSTAT1
689 SSSSTGYMKTE*ELISVSEVHPSRLQDN--MMPMSPDVF*GELKRSVAPVVFQCWTGPKEIDAVASDLGEFLAEEFQM*FENTPDLDRN* BT045567
689 GSSSTGYMKTE*ELISVSEVHPSRLQDN--MMPMSPDVF*GELKRSVAPVVFQCWTGPKEIDAV-----MTPDSDCN* rtSTAT1
695 GPKGTGYIKTE*ELISVSEVHPSRLQTTDNLLPMSP*EEFDEVSRI*VGSV-----EFD*SMMN-----TV--* HsSTAT1

```
